# Supplementary material
Source: Research Square preprint supplement (doi:10.21203/rs.3.rs-9538707/v1)
Supplement: Supplementary file 1 [file 4e6fa7d08db1c78448becdc8.docx]

**Supplementary Materials**

Additional datasets supporting this study are available at:

<https://doi.org/10.5281/zenodo.19747217>
